# Supplementary material for: Colombian university journalism as a virtual stage for transitions toward acts of memory and peace
Source: Frontiers journal article supplement (doi:10.3389/feduc.2022.953144), 2022-09-26
Supplement: Table_2.XLSX [file Table_2.XLSX]

## Sheet: Productos Finales
Num Producto	ESQUEMA DE VISUALIZACIÓN	EJE TEMÁTICO DE NARRACIÓN	REGIÓN	RUTA DE VISUALIZACIÓN	RUTA DE VISUALIZACIÓN	TIPO DE PRODUCTO	FORMATO	PRODUCTO	RUTA ESTÉTICO - PERIODÍSTICA	TITULO DEL PRODUCTO	COPY	OBJETIVO DEL PRODUCTO	GUION	LUGAR DE ELABORACIÓN	LUGAR SECUNDARIO DE ELABORACIÓN	CONTACTOS	EQUIPO	PRESUPUESTO PARA GRABACIÓN	UBICACIÓN EN EL MAPA INTERACTIVO	ENLACE PRODUCTO	ENLACE TABLEAU	CÓDIGO DE ANCLAJE	ENLACES PRODUCTOS UNIVERSITARIOS	Enlace en Youtube de CAPAZ
2		Explicación del proyecto y el portal	General		General	Producto general de país	Audiovisual	Video	No aplica	No aplica	Noaplica	video explicación del proyecto					JOHN Y AURORA			https://drive.google.com/drive/u/2/folders/1iYKc4eGCiif9gXD0hlwG_uENO98-mkH9	No tiene tableau	No tiene Tableau	No aplica	https://youtu.be/PEZMCn4LHNg
3	General al inicio de la plataforma y la ruta	No aplica	General		Ruta 1: Conflicto Armado	Producto general de país	Audiovisual	Video	Producción periodística: Vincular el soporte original del medio.	¿Cómo se narró el Conflicto Armado Interno?	Noaplica	Video explicación con cortes de documental	Pendiente	Pereira, Risaralda	No aplica	Pendiente	JOHN, AURORA, SHARIK Y DANIELA GIRALDO	200000	Al inicio de la página		https://public.tableau.com/views/Rutas2021-ConstruccinRutasPedaggicas-Final/GeneralConflictoArmado-GeneralPas?:language=es-ES&:display_count=n&:origin=viz_share_link	<div class='tableauPlaceholder' id='viz1643671763657' style='position: relative'><object class='tableauViz' style='display:none;'><param name='host_url' value='https%3A%2F%2Fpublic.tableau.com%2F' /> <param name='embed_code_version' value='3' /> <param name='site_root' value='' /><param name='name' value='Rutas2021-ConstruccinRutasPedaggicas-Final&#47;GeneralConflictoArmado-GeneralPas' /><param n…	No aplica
4	General al inicio de la plataforma y la ruta	No aplica	General		Ruta 2: Memoria de las Víctimas	Producto general de país	Audiovisual	Video	Producción periodística: Vincular el soporte original del medio.	¿Cómo se narró el Memoria de las víctimas?	Noaplica	Video explicación con cortes de documental	Pendiente	Pereira, Risaralda	No aplica	Pendiente	JOHN, AURORA, SHARIK, ANGIE, DANIELA AGUDELO, ILDA	200000	Al inicio de la página		https://public.tableau.com/views/Rutas2021-ConstruccinRutasPedaggicas-Final/GeneralMemoriadelasVctimas-GeneralPas2?:language=es-ES&:display_count=n&:origin=viz_share_link	<div class='tableauPlaceholder' id='viz1643671812491' style='position: relative'><object class='tableauViz' style='display:none;'><param name='host_url' value='https%3A%2F%2Fpublic.tableau.com%2F' /> <param name='embed_code_version' value='3' /> <param name='site_root' value='' /><param name='name' value='Rutas2021-ConstruccinRutasPedaggicas-Final&#47;GeneralMemoriadelasVctimas-GeneralPas2' /><pa…	No aplica
5	General al inicio de la plataforma y la ruta	No aplica	General		Ruta 3: Proceso de Paz	Producto general de país	Audiovisual	Video	Producción periodística: Vincular el soporte original del medio.	¿Cómo se narró el proceso de paz?	Noaplica	Video explicación con cortes de documental	Pendiente	Pereira, Risaralda	No aplica	Julián García, Casa Kolacho	JOHN, ANGIE, MARCELLO, AURORA, DANIELA, ANGIE, ALEJANDRO	200000	Al inicio de la página		https://public.tableau.com/views/Rutas2021-ConstruccinRutasPedaggicas-Final/GeneralProcesodePaz-GeneralPas3?:language=es-ES&:display_count=n&:origin=viz_share_link	<div class='tableauPlaceholder' id='viz1643671850470' style='position: relative'><object class='tableauViz' style='display:none;'><param name='host_url' value='https%3A%2F%2Fpublic.tableau.com%2F' /> <param name='embed_code_version' value='3' /> <param name='site_root' value='' /><param name='name' value='Rutas2021-ConstruccinRutasPedaggicas-Final&#47;GeneralProcesodePaz-GeneralPas3' /><param nam…	No aplica
6	En la etiqueta de la región	No aplica	Antioquia y Eje Cafetero		General Antioquia (MEDELLIN)	Producto general de región	Gráfico	Video Estudiante + Relatoría	Producción periodística: Vincular el soporte original del medio.	La cara mediática del conflicto	Las narraciones sobre el conflicto de Antioquia y el Eje Cafetero se han caracterizado por ser mediáticas; personajes como Pablo Escobar se posicionaron en el imaginario colectivo tanto nacional como internacional.	Video presentado por estudiante de periodismo de alguna universidad de Antioquia dando contexto cómo se narró el conflicto armado en esta región del país a través de una + infografía interactiva. (Video + infografía Interactiva) No tiene incisos	Pendiente	Medellín, Antioquia	Pereira, Risaralda	Pendiente	JOHN, DANIELA GIRALDO	2000000	Al ingresar a Región	https://drive.google.com/file/d/1OW2UY5QnXyCNKU1c7s3RiRdhK0GBJn52/view?usp=sharing	https://public.tableau.com/views/Rutas2021-ConstruccinRutasPedaggicas-Final/GeneralAntioquiayEjeCafetero?:language=es-ES&:display_count=n&:origin=viz_share_link	<div class='tableauPlaceholder' id='viz1651154335280' style='position: relative'><noscript><a href='#'><img alt=' ' src='https:&#47;&#47;public.tableau.com&#47;static&#47;images&#47;Ru&#47;Rutas2021-ConstruccinRutasPedaggicas-Final&#47;GeneralAntioquiayEjeCafetero&#47;1_rss.png' style='border: none' /></a></noscript><object class='tableauViz' style='display:none;'><param name='host_url' value='ht…	https://umcentral.umanizales.edu.co/index.php/hace-20-anos-arboleda-caldas-sufrio-su-peor-tragedia-por-culpa-de-las-farc/ https://www.youtube.com/watch?v=WPu3qHP0XLU http://www.funlam.edu.co/sextante/?p=1184	https://youtu.be/QxzxMIWVCF0
7	Específico con punto en el mapa	Víctimas de Ejecuciones extrajudiciales	Antioquia y Eje Cafetero		Ruta 1: Conflicto Armado	Producto específico de región	Sonoro	Informe Periodistico Sonoro	Consecuencias del proceso de paz, el conflicto y la memoria: ¿Cómo las respuestas de los grupos se han convertido en manifestaciones artísticas, culturales o políticas? Respuesta a un fenómeno social y naturalidad en la población frente a la construcción de memoria. (Ejercicio 100% periodístico para la construcción del producto)	¿Dónde enterraron a mi hijo?	Las ejecuciones extrajudiciales han sido uno de los crímenes del Conflicto Armado más dolorosos para las víctimas, siendo Antioquia una de las regiones donde más se perpetraron estos hechos. Colectivos de víctimas han logrado visibilizar los efectos de la guerra sobre las mismas, así como sus procesos de construcción de memoria.	Fragmentos de testimonios en voces dobladas. (Audios voces victimas). *Hay que entender que pueden darse procesos de memoria propios o guidados. Propios como esos ejercicios propuestos por y para las víctimas en y desde sus comunidades, sin la mediación de ningún agente externo. Guiados bajo la intervención de un actor, sea ONG's, Estado y sus entidades. *No exitió ninguna oposición ni barrera al…	Pendiente	Pereira, Risaralda	No aplica	Ninguno	AURORA, ANGIE, DANIELA AGUDELO, ALEJANDRO SEPULVEDA	200000	Medellín, Antioquia	https://drive.google.com/file/d/1AWTple70AIuSnfX36Vq2JrnZNYDBkHhA/view?usp=sharing	https://public.tableau.com/views/Rutas2021-ConstruccinRutasPedaggicas-Final/ConflictoArmadoAntioquiayEjeCafetero2?:language=es-ES&:display_count=n&:origin=viz_share_link	<div class='tableauPlaceholder' id='viz1643123737642' style='position: relative'><object class='tableauViz' style='display:none;'><param name='host_url' value='https%3A%2F%2Fpublic.tableau.com%2F' /> <param name='embed_code_version' value='3' /> <param name='site_root' value='' /><param name='name' value='Rutas2021-ConstruccinRutasPedaggicas-Final&#47;ConflictoArmadoAntioquiayEjeCafetero2' /><par…	https://umcentral.umanizales.edu.co/index.php/hace-20-anos-arboleda-caldas-sufrio-su-peor-tragedia-por-culpa-de-las-farc https://soundcloud.com/umcentral-umfm/el-vespertino- investigaciones-al-conflicto-armado-y-comunidad https://umcentral.umanizales.edu.co/index.php/informe-especial-el-miedo-y-la-violencia-ruidosa-en-colombia/?amp=1	No aplica para Youtube
8	Específico con punto en el mapa	Violencia en Medellín	Antioquia y Eje Cafetero		Ruta 2: Memoria de las Víctimas	Producto específico de región	Gráfico	Historieta corta	Unión entre periodismo universitario y sentido estético: Mediar entre la lógica periodística y las víctimas (animación, video, fotografía)	Medellín Claroscuro	Medellín es una ciudad con un pasado marcado por el narcotráfico. Pablo Escobar moldeó a los jóvenes a beneficio. En aras de una violencia que desbordó a la capital de Antioquia y puso a más de uno a elegir entre claroscuros de una guerra ajena.	Construcción de una pieza gráfica en la se haga evidencia una comparativa de datos reales con representaciones en el contexto cotidiano. Ejemplo a cuantos salones de clase equivale el nùmero de niños reclutados por el ELN. https://twitter.com/who/status/709842650875174912 (Infografía). No tiene Incisos	No aplica	Pereira, Risaralda	No aplica	Pendiente	MARCELLO Y DANIELA GIRALDO	200000	Medellín, Antioquia	https://drive.google.com/file/d/13zOIKuNnUNJrg0CKWfafjeiXxz65TG1j/view?usp=sharing	https://public.tableau.com/views/Rutas2021-ConstruccinRutasPedaggicas-Final/GeneralAntioquiayEjeCafetero?:language=es-ES&:display_count=n&:origin=viz_share_link	<div class='tableauPlaceholder' id='viz1651154421528' style='position: relative'><noscript><a href='#'><img alt=' ' src='https:&#47;&#47;public.tableau.com&#47;static&#47;images&#47;Ru&#47;Rutas2021-ConstruccinRutasPedaggicas-Final&#47;MemoriadelasVctimasAntioquiayEjeCafetero3&#47;1_rss.png' style='border: none' /></a></noscript><object class='tableauViz' style='display:none;'><param name='host_u…	http://bitacora.eafit.edu.co/reportajes/el-rio-lo-invadia-todo-sin-parar/	No aplica para Youtube
9	Específico con punto en el mapa	Comuna 13	Antioquia y Eje Cafetero		Ruta 3: Proceso de Paz	Producto específico de región	Audiovisual	Video clip - Comuna 13	Consecuencias del proceso de paz, el conflicto y la memoria: ¿Cómo las respuestas de los grupos se han convertido en manifestaciones artísticas, culturales o políticas? Respuesta a un fenómeno social y naturalidad en la población frente a la construcción de memoria. (Ejercicio 100% periodístico para la construcción del producto)	Comuna 13: arte y vida	La Comuna 13 de Medellín es, para muchas personas, sinónimo de guerra. Ese territorio que décadas atrás fue protagonista de diferentes conflictos, es desde 2008 un espacio resignificado, donde se respira la cultura, el arte y la memoria, así como la resiliencia de sus habitantes respecto a la construcción de paz.	A través de un video clip evidenciar la transformación de un espacio protagonista del Conflicto Armado en un lugar resignificado por el arte y el turismo: Graffitour Comuna 13 (Video clip - Comuna 13). *Es gracias a las narraciones que encontraron espacio en los productos periodisticos, que entendemos que la garantias de no repetición. No están siendo comtempladas es la etapa de implementación.	Pendiente	Medellín, Antioquia	No aplica	Pendiente	SHARIK	0	Medellín, Antioquia	https://drive.google.com/file/d/1Ffte-dvQdu3hR-JHMvdDwnKcdYHACCrT/view?usp=sharing	https://public.tableau.com/views/Rutas2021-ConstruccinRutasPedaggicas-Final/ProcesodePazAntioquiayEjeCafetero4?:language=es-ES&:display_count=n&:origin=viz_share_link	<div class='tableauPlaceholder' id='viz1643123977050' style='position: relative'><object class='tableauViz' style='display:none;'><param name='host_url' value='https%3A%2F%2Fpublic.tableau.com%2F' /> <param name='embed_code_version' value='3' /> <param name='site_root' value='' /><param name='name' value='Rutas2021-ConstruccinRutasPedaggicas-Final&#47;ProcesodePazAntioquiayEjeCafetero4' /><param …	https://www.youtube.com/watch?v=WPu3qHP0XLU http://www.funlam.edu.co/sextante/?p=1184 http://norteurbanodigital.com/del-caos-a-las-oportunidades/ http://norteurbanodigital.com/hasta-que-se-cumpla-la-amenaza-o-la-paz/	https://youtu.be/P7s-MIyCXPU
10	En la etiqueta de la región	Lideres sociales	Caribe		General Caribe (SANTA MARTA)	Producto general de región	Audiovisual	Video Estudiante + Vídeoclip documental	Consecuencias del proceso de paz, el conflicto y la memoria: ¿Cómo las respuestas de los grupos se han convertido en manifestaciones artísticas, culturales o políticas? Respuesta a un fenómeno social y naturalidad en la población frente a la construcción de memoria. (Ejercicio 100% periodístico para la construcción del producto)	Periodismo en la costa caribe: un reto de vida	El asesinato de líderes sociales en departamentos del caribe colombiano, impulsó a Ketty Roqueme a investigar el porqué de los acontecimientos. Amenazada por actores armados responde con reflexiones frente al ejercicio periodístico universitario que ejerce	Video presentado por estudiante de periodismo de alguna universidad del Caribe dando contexto cómo se narró el conflicto armado en esta región del país a través de un video. (Video + Video Clip). *Esta región fue narrada por los medios Plataforma, Estación V, De la Urbe. *Para esta región se usaron 2 productos: web y sonoro.	Pendiente	Barranquilla, Atlántico	No aplica	Pendiente	MARCELLO LESMES	2000000	Al ingresar a Región	https://drive.google.com/file/d/1sFcekCQmipBeO5nhiNMiOhHkxci6slAj/view?usp=sharing	https://public.tableau.com/views/Rutas2021-ConstruccinRutasPedaggicas-Final/GeneralCaribe?:language=es-ES&:display_count=n&:origin=viz_share_link	<div class='tableauPlaceholder' id='viz1643672273262' style='position: relative'><object class='tableauViz' style='display:none;'><param name='host_url' value='https%3A%2F%2Fpublic.tableau.com%2F' /> <param name='embed_code_version' value='3' /> <param name='site_root' value='' /><param name='name' value='Rutas2021-ConstruccinRutasPedaggicas-Final&#47;GeneralCaribe' /><param name='tabs' value='ye…	https://plataforma.bucaramanga.upb.edu.co/images/archivo/pdf/edicion-46.pdf https://plataforma.bucaramanga.upb.edu.co/images/archivo/pdf/edicion-40.pdf	https://youtu.be/7owEFrg0dDM
11	Específico con punto en el mapa	Resistencia	Caribe		Ruta 1: Conflicto Armado	Producto específico de región	Gráfico	Infografía	Proposición desde las víctimas: Apuesta estética, creación del relato para sensibilizar desde la lógica de las víctimas.	Esperanza y Resistencia: Simití, un pueblo que no se rinde	Simití es un territorio de "Mucha tierra", sus menos de 10.000 habitantes respiran esperanza. Organizados desde 2006 como Comité Cívico junto a la ayuda de sus vecinos en otros municipios, no se rinden por construir paz y desarrollo. No se rinden ante la violencia.	Contrucción de una pieza gráfica sobre los procesos civiles en los que se unen las víctimas despues de sufrir la violencia. (Infografía).	No aplica	Pereira, Risaralda	No aplica	Ninguno	DANIELA GIRALDO, MARCELLO	200000	Simití, Bolívar	https://drive.google.com/file/d/1NSekBK6dt3W0S8XyEwUi8Qtc4BnygQWs/view?usp=sharing	https://public.tableau.com/views/Rutas2021-ConstruccinRutasPedaggicas-Final/ConflictoArmadoCaribe2?:language=es-ES&:display_count=n&:origin=viz_share_link	<div class='tableauPlaceholder' id='viz1643124628449' style='position: relative'><object class='tableauViz' style='display:none;'><param name='host_url' value='https%3A%2F%2Fpublic.tableau.com%2F' /> <param name='embed_code_version' value='3' /> <param name='site_root' value='' /><param name='name' value='Rutas2021-ConstruccinRutasPedaggicas-Final&#47;ConflictoArmadoCaribe2' /><param name='tabs' …	https://plataforma.bucaramanga.upb.edu.co/images/archivo/pdf/edicion-40.pdf https://plataforma.bucaramanga.upb.edu.co/images/archivo/pdf/edicion-35.pdf	No aplica para Youtube
12	Específico con punto en el mapa	Enfoque de género y diversidad	Caribe		Ruta 2: Memoria de las Víctimas	Producto específico de región	Sonoro	Entrevista con comunidades Lgtbiq+	Proposición desde las víctimas: Apuesta estética, creación del relato para sensibilizar desde la lógica de las víctimas.	Resistencia diversa	La población LGTBIQ+ ha tenido sus propias luchas durante el conflicto, con más de 2.000 personas de este colectivo que han sido impactadas por ello. Desde la organización Caribe Afirmativo impulsan estrategias para crear espacios seguros y continuar procesos de memoria y resistencia.	Sonoro	Pendiente	Pereira, Risaralda	No aplica	Pendiente	SHARIK Y MARCELLO	200000	Santa Marta, Magdalena	https://drive.google.com/file/d/1Hn2pTHYNhsKiXVC_Bp2INiQaZKqzqIdn/view?usp=sharing	https://public.tableau.com/views/Rutas2021-ConstruccinRutasPedaggicas-Final/MemoriadelasVctimasCaribe3?:language=es-ES&:display_count=n&:origin=viz_share_link	<div class='tableauPlaceholder' id='viz1643672444519' style='position: relative'><object class='tableauViz' style='display:none;'><param name='host_url' value='https%3A%2F%2Fpublic.tableau.com%2F' /> <param name='embed_code_version' value='3' /> <param name='site_root' value='' /><param name='name' value='Rutas2021-ConstruccinRutasPedaggicas-Final&#47;MemoriadelasVctimasCaribe3' /><param name='ta…	https://www.ivoox.com/comision-verdad-28-de-audios-mp3_rf_58635665_1.html	No aplica para Youtube
13	Específico con punto en el mapa	Indígenas y territorios	Caribe		Ruta 3: Proceso de Paz	Producto específico de región	Gráfico	Infografía	Proposición desde las víctimas: Apuesta estética, creación del relato para sensibilizar desde la lógica de las víctimas.	La línea negra, mucho más que un territorio indigena	Comunidades indígenas de arahuacos se disputan la permanencia y cuidado de los territorios que históricamente son suyos. Un decreto del 2018 los mantiene a flote en un pleito legal.	Construcción de una pieza gráfica sobre los derechos de los indigenas y hacer una relación con el proceso de paz. (Infografía).	Pendiente	Pereira, Risaralda	No aplica	Pendiente	DANIELA GIRALDO, DANNA MAVISOY, MARCELLO	200000	Barrancas, Guajira	https://drive.google.com/file/d/1hmKvkEMTjhV7rMNQB9w1imc5Y39F9eLG/view?usp=sharing	https://public.tableau.com/views/Rutas2021-ConstruccinRutasPedaggicas-Final/ProcesodePazCaribe4?:language=es-ES&:display_count=n&:origin=viz_share_link	<div class='tableauPlaceholder' id='viz1643124653416' style='position: relative'><object class='tableauViz' style='display:none;'><param name='host_url' value='https%3A%2F%2Fpublic.tableau.com%2F' /> <param name='embed_code_version' value='3' /> <param name='site_root' value='' /><param name='name' value='Rutas2021-ConstruccinRutasPedaggicas-Final&#47;ProcesodePazCaribe4' /><param name='tabs' val…	https://delaurbe.udea.edu.co/index.php/canales/periodico/edicion-100/item/48-un-decreto-para-proteger-el-corazon-del-mundo	No aplica para Youtube
14	En la etiqueta de la región		Centro Oriente		General Centro - Oriente (BOGOTA)	Producto general de región	Audiovisual	Video Estudiante + Galería Fotográfica	Consecuencias del proceso de paz, el conflicto y la memoria: ¿Cómo las respuestas de los grupos se han convertido en manifestaciones artísticas, culturales o políticas? Respuesta a un fenómeno social y naturalidad en la población frente a la construcción de memoria. (Ejercicio 100% periodístico para la construcción del producto)	Un recorrido histórico por la capital	En Bogotá se encuentran diferentes espacios que han sido clave en el Conflicto y el Posconflicto Armado: el Teatro Colón donde se firmó el Acuerdo de Paz, el Palacio de Justicia testigo de episodios históricos asociados al Proceso de Paz, entre otros. Estos espacios cuentan la historia de cómo se ha vivido dicho proceso desde la institucionalidad.	Video presentado por estudiante de periodismo de alguna universidad del Centro Oriente colombiano dando contexto de cómo se narró el conflicto armado en esta región del país a través de un vdeo. (Video + Galería fotográfica). *En este modelo actancial se presentan los corpus WEB y PDF como formatos predominantes para la narración del conflicto armado interno. *En este modelo actancial se presenta…	Pendiente	Bogotá, Cundinamarca	No aplica	Pendiente	SHARIK	500000	Bogotá, Cundinamarca	https://drive.google.com/file/d/1SsSu9jyDAO4pyElbdHRdoMGJnM5cauRY/view?usp=sharing	https://public.tableau.com/views/Rutas2021-ConstruccinRutasPedaggicas-Final/GeneralCentroOriente?:language=es-ES&:display_count=n&:origin=viz_share_link	<div class='tableauPlaceholder' id='viz1643907220953' style='position: relative'><object class='tableauViz' style='display:none;'><param name='host_url' value='https%3A%2F%2Fpublic.tableau.com%2F' /> <param name='embed_code_version' value='3' /> <param name='site_root' value='' /><param name='name' value='Rutas2021-ConstruccinRutasPedaggicas-Final&#47;GeneralCentroOriente' /><param name='tabs' va…	No aplica	https://youtu.be/K0UEGsftKYI
15	Específico con punto en el mapa	Conflicto e infancia	Centro Oriente		Ruta 1: Conflicto Armado	Producto específico de región	Audiovisual	Corto	Consecuencias del proceso de paz, el conflicto y la memoria: ¿Cómo las respuestas de los grupos se han convertido en manifestaciones artísticas, culturales o políticas? Respuesta a un fenómeno social y naturalidad en la población frente a la construcción de memoria. (Ejercicio 100% periodístico para la construcción del producto)	Fundación COMPAZ	Miguel es un hombre de 45 años que a través de la música se transporta a momentos pasados de su vida cuando fue reclutado por el ELN en Santander, época en la que también nació su amor por la música y su labor en la construcción de paz.	Pieza audiovisual - Filminuto de un niño ve a su papá en televisión siendo entrevistado por un periodista universitario, sin saber que es desmovilizado/en proceso judicial (Filminuto). No inciso	Pendiente	Pereira, Risaralda	No aplica	Pendiente	JOHN, ANGIE, AURORA, SHARIK, MARCELLO, JUANA VÉLEZ	200000	Sutamarchán, Boyacá	https://drive.google.com/file/d/1T0bG1JNgm-6PnTvYicXjnCdet5r8UUkM/view?usp=sharing	https://public.tableau.com/views/Rutas2021-ConstruccinRutasPedaggicas-Final/ConflictoArmadoCentroOriente2?:language=es-ES&publish=yes&:display_count=n&:origin=viz_share_link	<div class='tableauPlaceholder' id='viz1647964694515' style='position: relative'><noscript><a href='#'><img alt=' ' src='https:&#47;&#47;public.tableau.com&#47;static&#47;images&#47;Ru&#47;Rutas2021-ConstruccinRutasPedaggicas-Final&#47;ConflictoArmadoCentroOriente2&#47;1_rss.png' style='border: none' /></a></noscript><object class='tableauViz' style='display:none;'><param name='host_url' value='h…	https://www.periodico15.com/del-horror-paramilitar-y-otros-demonios-entrega-de-informes-del-cnmh-en-santander/ https://www.periodico15.com/colegio-cafe-madrid-continua-siendo-lugar-focal-del-plan-semilleros-paz/ https://www.periodico15.com/participacion-ciudadana-eje-las-negociaciones-gobierno-eln/	https://youtu.be/Sa8msc7blTQ
16	Específico con punto en el mapa	Procesos de Memoria	Centro Oriente		Ruta 2: Memoria de las Víctimas	Producto específico de región	Grafico	Infografía	Consecuencias del Proceso de Paz, el Conflicto Armado y la Memoria: ¿Cómo las respuestas de los grupos se han convertido en manifestaciones artísticas, culturales o políticas? Respuesta a un fenómeno social y naturalidad en la población frente a la construcción de memoria. (Ejercicio 100% periodístico para la construcción del producto)	Santander, departamento que vive la memoria	La paz y la memoria se perfuman a cacao en los territorios campesinos de Santander. 21 excombatientes que producen y comercializan cacao chucureño al lado de las que fueron sus víctimas, demuestran que entre todos se puede construir la paz.	Infografia	Pendiente	Pereira, Risaralda	No aplica	Pendiente	MARCELLO, DANIELA GIRALDO	200000	San Vicente del Chucurí, Santander	https://drive.google.com/file/d/1iaX0RPJtiC40RnnzIQp2l99md3lQ3bcS/view?usp=sharing	https://public.tableau.com/views/Rutas2021-ConstruccinRutasPedaggicas-Final/MemoradelasVctimasCentroOriente3?:language=es-ES&:display_count=n&:origin=viz_share_link	<div class='tableauPlaceholder' id='viz1643124767265' style='position: relative'><object class='tableauViz' style='display:none;'><param name='host_url' value='https%3A%2F%2Fpublic.tableau.com%2F' /> <param name='embed_code_version' value='3' /> <param name='site_root' value='' /><param name='name' value='Rutas2021-ConstruccinRutasPedaggicas-Final&#47;MemoradelasVctimasCentroOriente3' /><param na…	https://www.periodico15.com/edicion-350-del-1-al-15-de-diciembre-de-2017/	No aplica para Youtube
17	Específico con punto en el mapa	Experiencias del proceso de paz	Centro Oriente		Ruta 3: Proceso de Paz	Producto específico de región	Sonoro	Sondeo de opinión	Consecuencias del proceso de paz, el conflicto y la memoria: ¿Cómo las respuestas de los grupos se han convertido en manifestaciones artísticas, culturales o políticas? Respuesta a un fenómeno social y naturalidad en la población frente a la construcción de memoria. (Ejercicio 100% periodístico para la construcción del producto)	Al microfono por la paz	Los ciudadanos de Colombia también son participantes activos del proceso de paz y el posconflicto. Miembros de la sociedad civil reflexionan sobre la construcción de país en la etapa del posconflicto.	Espacio callejero donde se le pregunta a varios transeúntes sus conceptos sobre el conflicto (Video experimental - prejuicio). Sin incisos	Pendiente	Bogotá, Cundinamarca	No aplica	Pendiente	JOHN, ANGIE, AURORA, SHARIK, MARCELLO	500000	Bogotá, Cundinamarca	https://drive.google.com/file/d/1gW0_QPgmj55suQkpsJe4MtofkwvKVAxj/view?usp=sharing	https://public.tableau.com/views/Rutas2021-ConstruccinRutasPedaggicas-Final/ProcesodePazCentroOriente4?:language=es-ES&publish=yes&:display_count=n&:origin=viz_share_link	<div class='tableauPlaceholder' id='viz1644599414146' style='position: relative'><object class='tableauViz' style='display:none;'><param name='host_url' value='https%3A%2F%2Fpublic.tableau.com%2F' /> <param name='embed_code_version' value='3' /> <param name='site_root' value='' /><param name='name' value='Rutas2021-ConstruccinRutasPedaggicas-Final&#47;ProcesodePazCentroOriente4' /><param name='ta…	https://www.periodico15.com/tenemos-que-trabajar-por-crear-una-cultura-de-paz-roberto-sancho/ https://www.periodico15.com/amovi-escenario-recordar-lo-la-guerra-les-dejo-las-victimas/ https://www.periodico15.com/todd-howland-las-farc-estan-implementando-los-acuerdos-en-tiempo-real-y-el-gobierno-esta-haciendo-planes-en-tiempo-real/	No aplica para Youtube
18	En la etiqueta de la región	No aplica	Amazonía		General Amazonía (FLORENCIA)	Producto general de región	Audiovisual	Video Estudiante + Informe periodístico Audiovisual	Unión entre periodismo universitario y sentido estético: Mediar entre la lógica periodística y las víctimas (animación, video, fotografía)	La soledad en la Amazonía	La Amazonía, el pulmón de Colombia, ha sido escenario de diferentes fenómenos relacionados con el conflicto: problemas de tierras, cultivos ilícitos, ataques entre diferentes grupos armados y otros escenarios que han evidenciado la ausencia del Estado en estos territorios.	Video presentado por estudiante de periodismo de alguna universidad del Amazonas dando contexto cómo se narró el conflicto armado en esta región del país a través de un Informe periodistico sobre el contexto de los cultivos de coca, la transición del caucho a la coca. (Video Informe periodisticos audiovisual). *La mayoría de los contenidos son web, bajo el formato de crónica. Tan solo el 1% de fo…	Pendiente	Florencia, Caquetá	No aplica	Pendiente	JOHN, MARCELLO	500000	Al ingresar a Región	https://drive.google.com/file/d/1DvL85v-bTEQiJ46ONl786-DYnX7_yy-b/view?usp=sharing	https://public.tableau.com/views/Rutas2021-ConstruccinRutasPedaggicas-Final/GeneralAmazona?:language=es-ES&publish=yes&:display_count=n&:origin=viz_share_link	<div class='tableauPlaceholder' id='viz1646232932795' style='position: relative'><object class='tableauViz' style='display:none;'><param name='host_url' value='https%3A%2F%2Fpublic.tableau.com%2F' /> <param name='embed_code_version' value='3' /> <param name='site_root' value='' /><param name='name' value='Rutas2021-ConstruccinRutasPedaggicas-Final&#47;GeneralAmazona' /><param name='tabs' value='y…	https://www.youtube.com/watch?v=TrSHRjgC89k	https://youtu.be/nD65F0DHDKE
19	Específico con punto en el mapa	Cultivos ilíctios	Amazonía		Ruta 1: Conflicto Armado	Producto específico de región	Gráfico	Infografía	Unión entre periodismo universitario y sentido estético: Mediar entre la lógica periodística y las víctimas (animación, video, fotografía)	Guaviare: de la coca a la paz	De la coca a la paz, hay 60 años de historia y mucho trabajo por consolidar esta última, sin embargo, y aunque para 2016 existían 6.838 hectáreas de cultivo de coca, esto es solo la consecuencia de un problema mayor.	Recopilación documental de notas periodísticas acerca de los cultivos ilícitos en esta zona del país *El Estado interviene con el Programa de Sustitución de Cultivos Ilícitos (PNIS) con la idea de "promover la sustitución voluntaria de cultivos de uso ilícito, a través del desarrollo de programas y proyectos para contribuir a la superación de condiciones de pobreza y marginalidad de las familias …	No aplica	Pereira, Risaralda	No aplica	Pendiente	MARCELLO, DANIELA GIRALDO	200000	San José del Guaviare, Guaviare	https://drive.google.com/file/d/1w-hCpNhxd77HlN3c5NTp28GD0itEPHg1/view?usp=sharing	https://public.tableau.com/views/Rutas2021-ConstruccinRutasPedaggicas-Final/ConflictoArmadoAmazona2?:language=es-ES&:display_count=n&:origin=viz_share_link	<div class='tableauPlaceholder' id='viz1643124912153' style='position: relative'><object class='tableauViz' style='display:none;'><param name='host_url' value='https%3A%2F%2Fpublic.tableau.com%2F' /> <param name='embed_code_version' value='3' /> <param name='site_root' value='' /><param name='name' value='Rutas2021-ConstruccinRutasPedaggicas-Final&#47;ConflictoArmadoAmazona2' /><param name='tabs'…	https://www.youtube.com/watch?v=TrSHRjgC89k https://www.otunmedialab.com/lasremembranzasdelacoca	No aplica para Youtube
20	Específico con punto en el mapa	Ejército	Amazonía		Ruta 2: Memoria de las Víctimas	Producto específico de región	Gráfico	Infografía	Producción periodística: Vincular el soporte original del medio.	La otra cara, la historia de Israel	La historia de Israel visibiliza un lado poco contado de la violencia: los miembros del Ejército Nacional como víctimas, en 50 años de Conflicto Armado se arroja un número de 14.864 de sus integrantes como tales.	Construcción de una pieza gráfica en la que se evidencie cómo ha sido la mediación del Ejército Nacional en el conflicto armado. (Línea del tiempo). *Hay que entender que este mundo lexical no precisamente explica o narra la memoria de las víctimas, pero el dendograma que lo acompaña sí. Además, el relato se configura a lo largo del país, pero tiene representación en Caquetá.	Pendiente	Pereira, Risaralda	No aplica	Pendiente	MARCELLO, DANIELA GIRALDO	200000	Florencia, Caquetá	https://drive.google.com/file/d/159VkD29q-1qHlHUDWQCK5TCsGtOksa04/view?usp=sharing	https://public.tableau.com/views/Rutas2021-ConstruccinRutasPedaggicas-Final/ProcesodePazAntioquiayEjeCafetero4?:language=es-ES&:display_count=n&:origin=viz_share_link	<div class='tableauPlaceholder' id='viz1643124994530' style='position: relative'><object class='tableauViz' style='display:none;'><param name='host_url' value='https%3A%2F%2Fpublic.tableau.com%2F' /> <param name='embed_code_version' value='3' /> <param name='site_root' value='' /><param name='name' value='Rutas2021-ConstruccinRutasPedaggicas-Final&#47;MemoriadelasVctimasAmazona3' /><param name='t…	https://issuu.com/dateatealminuto/docs/periodico_dateateed36_23-11-2016_im	No aplica para Youtube
21	En la etiqueta de la región	No aplica	Orinoquía		General Orinoquía (META)	Producto general de región	Audiovisual	Video Estudiante + Informe periodístico Audiovisual	Unión entre periodismo universitario y sentido estético: Mediar entre la lógica periodística y las víctimas (animación, video, fotografía)	La paz: inestable en el piedemonte llanero	En aquellos pueblos donde terminan las cordilleras e inician las llanuras y morichales, existen estudiantes que narran hechos de violencia en el Llano; su impacto también se refleja en las Universidades.	Video presentado por estudiante de periodismo de alguna universidad de los Llanos Orientales dando contexto cómo se narró el conflicto armado y la coca en esta región del país a través de un Informe periodistico. (Video Informe periodisticos audiovisual). *Hay que entender que para esta región el número de productos es muy superficial, y para abordar su narrativa habría que generar un producto po…	Pendiente	Villavicencio, Meta	No aplica	Pendiente	SHARIK	500000	Al ingresar a Región	https://drive.google.com/file/d/1GU--PMI6tixTUmg3RfOkfuYgQe8eGyMK/view?usp=sharing	https://public.tableau.com/views/Rutas2021-ConstruccinRutasPedaggicas-Final/GeneralLlanosOrientales?:language=es-ES&publish=yes&:display_count=n&:origin=viz_share_link	<div class='tableauPlaceholder' id='viz1643907287399' style='position: relative'><object class='tableauViz' style='display:none;'><param name='host_url' value='https%3A%2F%2Fpublic.tableau.com%2F' /> <param name='embed_code_version' value='3' /> <param name='site_root' value='' /><param name='name' value='Rutas2021-ConstruccinRutasPedaggicas-Final&#47;GeneralLlanosOrientales' /><param name='tabs'…	https://issuu.com/revistaunpretexto/docs/revista_un_pretexto_no._4	https://youtu.be/YW4ozQKAz4Q
22	Específico con punto en el mapa	Territorio - Autodefensas Campesinas	Orinoquía		Ruta 1: Conflicto Armado	Producto específico de región	Sonoro	Radio novela	Unión entre periodismo universitario y sentido estético: Mediar entre la lógica periodística y las víctimas (animación, video, fotografía)	Nada por la vida	50 campesinos de Recetor fueron retenidos en el año 2003 por el accionar violento de las Autodefensas Campesinas de Casanare; Mateo Reyes tomó una decisión radical ante la situación: escapar por el río Sunce.	Radio novela	Pendiente	Pereira, Risaralda	No aplica	Pendiente	AURORA, ANGIE, DANIELA AGUDELO,	200000	Yopal, Casanare	https://drive.google.com/file/d/11Umapy00pjkkDHdy4rVQvXtjSY85qp2c/view?usp=sharing	https://public.tableau.com/views/Rutas2021-ConstruccinRutasPedaggicas-Final/ConflictoArmadoLlanosOrientales2?:language=es-ES&:display_count=n&:origin=viz_share_link	<div class='tableauPlaceholder' id='viz1643906443958' style='position: relative'><object class='tableauViz' style='display:none;'><param name='host_url' value='https%3A%2F%2Fpublic.tableau.com%2F' /> <param name='embed_code_version' value='3' /> <param name='site_root' value='' /><param name='name' value='Rutas2021-ConstruccinRutasPedaggicas-Final&#47;ConflictoArmadoLlanosOrientales2' /><param na…	https://issuu.com/revistaunpretexto/docs/revista_un_pretexto_no._4	No aplica para Youtube
23	Específico con punto en el mapa	Justicia y reparación	Orinoquía		Ruta 3: Proceso de Paz	Producto específico de región	Audiovisual	Vídeo desde las asociaciones que cuidan el territorio en el Meta (Contacto Alex Barreto amigo Páez)	Producción periodística: Vincular el soporte original del medio.	Orinoquía: la magnitud del territorio sin reparar	La Orinoquía es una región bullente de comercio, ganadería y naturaleza, pero estos factores, permeados por el Conflicto Armado, también convierten a este territorio en uno de los más complejos a nivel socioeconómico por la implementación del Programa Nacional Integral de Sustitución de Cultivos Ilícitos.	Construcción de perfil con alguien (Escrito - Perfil). *Este producto fue hecho por estudiantes de UniSabana. Es producto no tiene mucha relación solo, podría ser descartado del proceso.	Pendiente	Villavicencio, Meta	No aplica	Pendiente	ANGIE	200000	Villavicencio, Meta	https://drive.google.com/file/d/1vUw6jji2eYEBSVIm1oFwybR-PwBamnPa/view?usp=sharing	https://public.tableau.com/views/Rutas2021-ConstruccinRutasPedaggicas-Final/ProcesodePazLlanosOrientales3?:language=es-ES&:display_count=n&:origin=viz_share_link	<div class='tableauPlaceholder' id='viz1643906478669' style='position: relative'><object class='tableauViz' style='display:none;'><param name='host_url' value='https%3A%2F%2Fpublic.tableau.com%2F' /> <param name='embed_code_version' value='3' /> <param name='site_root' value='' /><param name='name' value='Rutas2021-ConstruccinRutasPedaggicas-Final&#47;ProcesodePazLlanosOrientales3' /><param name=…	Este producto nace por la plena relación entre: la tenencia de las tierras, la ganadería y su relación con la violencia ejercida por grupos armados ilegales. Interés de los periodistas universitarios.	https://youtu.be/qopNEuCoeqA
24	En la etiqueta de la región	No aplica	Tolima Grande		General Tolima Grande (IBAGUE	Producto general de región	Audiovisual	Video Estudiante + perfil audiovisual (víctima o testigo de la toma de 1999)	Producción periodística: Vincular el soporte original del medio.	Y la cima es la paz	Tolima registró 66 incursiones guerrilleras desde 1965 hasta 2013. Estos eventos marcaron la historia de los tolimenses. Hoy, cuesta arriba, van camino hacia la paz y la reparación.	Video presentado por estudiante de periodismo de alguna universidad del Tolima dando contexto cómo se narró el conflicto armado en esta región del país a través de un cómic interactivo. (Video + Comic interactivo). Referencia http://4rios.co/elnaya/ *En este modelo actancial se presentan los corpus SONORO y AUDIOVISUAL como formatos predominantes para la narración de la Memoria de las Víctimas. *…	Pendiente	Ibagué, Tolima	Pereira, Risaralda	Pendiente	SHARIK	500000	Ibagué, Tolima	https://drive.google.com/file/d/18HDRn8SRQw_ptBxcG281k6R6ssNUgU2q/view?usp=sharing	https://public.tableau.com/views/Rutas2021-ConstruccinRutasPedaggicas-Final/GeneralTolimaGrande?:language=es-ES&publish=yes&:display_count=n&:origin=viz_share_link	<div class='tableauPlaceholder' id='viz1643907571167' style='position: relative'><object class='tableauViz' style='display:none;'><param name='host_url' value='https%3A%2F%2Fpublic.tableau.com%2F' /> <param name='embed_code_version' value='3' /> <param name='site_root' value='' /><param name='name' value='Rutas2021-ConstruccinRutasPedaggicas-Final&#47;GeneralTolimaGrande' /><param name='tabs' val…	https://www.elanzuelomedios.com/index.php/lo-mas-leido/734-12-horas-de-terror	https://youtu.be/WHcpBmjxpv0
25	Específico con punto en el mapa	Jóvenes y conflicto	Tolima Grande		Ruta 2: Memoria de las Víctimas	Producto específico de región	Sonoro	Perfil Sonoro Testimonio Asociación de víctimas del Tolima	Proposición desde las víctimas: Apuesta estética, creación del relato para sensibilizar desde la lógica de las víctimas.	Renacer por tercera vez	Jaime es uno entre más de 100.000 víctimas de desplazamiento forzado en el Tolima. A sus 65 años, se levanta todos los días para ayudar a otras víctimas a través de su asociación. Personas que, como hizo él, intentan buscar un respaldo del Estado para continuar.	Perfil sonoro con víctima del conflicto armado	Pendiente	Ibagué, Tolima	No aplica	Pendiente	AURORA	500000	Dolores, Tolima	https://drive.google.com/file/d/1qpi61QuZ8DCim2eE_qCg843u71tSfEnv/view?usp=sharing	https://public.tableau.com/views/Rutas2021-ConstruccinRutasPedaggicas-Final/MemoradelasVctimasCentroOriente3?:language=es-ES&:display_count=n&:origin=viz_share_link	<div class='tableauPlaceholder' id='viz1643673427802' style='position: relative'><object class='tableauViz' style='display:none;'><param name='host_url' value='https%3A%2F%2Fpublic.tableau.com%2F' /> <param name='embed_code_version' value='3' /> <param name='site_root' value='' /><param name='name' value='Rutas2021-ConstruccinRutasPedaggicas-Final&#47;MemoradelasVctimasCentroOriente3' /><param na…	https://www.elanzuelomedios.com/index.php/lo-mas-leido/734-12-horas-de-terror	No aplica para Youtube
26	Específico con punto en el mapa	Jóvenes/Adultos - Urbano/Campo	Tolima Grande		Ruta 3: Proceso de Paz	Producto específico de región	Audiovisual	Informe Periodistico	Proposición desde las víctimas: Apuesta estética, creación del relato para sensibilizar desde la lógica de las víctimas.	Cajamarca: revolución por la vida	En Tolima, donde se gestó el conflicto armado en 1964, Hever Olivera cultiva el campo y la comunidad. Este líder, que ha dedicado su vida a la finca que heredó de su familia, defiende la soberanía de los campesinos sobre sus tierras.	Por medio de un video clip evidenciar el contexto y los procesos locales de memoria (Video Clip). No inciso	Pendiente	Ibagué, Tolima	No aplica	Pendiente	MARCELLO	500000	Ibagué, Tolima	https://drive.google.com/drive/u/2/folders/1xZ1qQPImUGfHWGHnXPipKkyljfYy2dMC	https://public.tableau.com/views/Rutas2021-ConstruccinRutasPedaggicas-Final/ProcesodePazTolimaGrande3?:language=es-ES&publish=yes&:display_count=n&:origin=viz_share_link	<div class='tableauPlaceholder' id='viz1644359723169' style='position: relative'><object class='tableauViz' style='display:none;'><param name='host_url' value='https%3A%2F%2Fpublic.tableau.com%2F' /> <param name='embed_code_version' value='3' /> <param name='site_root' value='' /><param name='name' value='Rutas2021-ConstruccinRutasPedaggicas-Final&#47;ProcesodePazTolimaGrande3' /><param name='tab…	https://www.youtube.com/watch?v=UpnlSuGDZRc	https://youtu.be/26MaK3OW7Is
27	En la etiqueta de la región	No aplica	Pacífico		General Pacífico (CALI)	Producto general de región	Audiovisual	Video Estudiante + Infografia	Producción periodística: Vincular el soporte original del medio.	Pacífico: más que memoria y paz	El Pacífico es una de las regiones más diversas de Colombia, desde su multiculturalidad hasta su topografía. Allí, en uno de los territorios más afectados por la violencia, se tejen lazos, comunidades y actividades de resistencia.	Video presentando los resultados	Pendiente	Cali, Valle del Cauca	Pereira, Risaralda	Angie Serna Univalle	JOHN, ANGIE, AURORA, DISEÑADOR, DANIELA LOMBANA	300000	Al ingresar a Región	https://drive.google.com/file/d/100BowsJKuHIVozPq5zS0xWdwRMocuxcm/view?usp=sharing	https://public.tableau.com/views/Rutas2021-ConstruccinRutasPedaggicas-Final/GeneralPacfico?:language=es-ES&publish=yes&:display_count=n&:origin=viz_share_link	<div class='tableauPlaceholder' id='viz1646235744898' style='position: relative'><object class='tableauViz' style='display:none;'><param name='host_url' value='https%3A%2F%2Fpublic.tableau.com%2F' /> <param name='embed_code_version' value='3' /> <param name='site_root' value='' /><param name='name' value='Rutas2021-ConstruccinRutasPedaggicas-Final&#47;GeneralPacfico' /><param name='tabs' value='y…	http://elclaustro.com.co/elclaustro/los-retos-de-la-paz/ http://elclaustro.com.co/elclaustro/comunicacion-para-el-cambio-social/ http://elclaustro.com.co/elclaustro/la-realidad-en-las-calles-de-popayan-economia-informal http://elclaustro.com.co/elclaustro/mas-juntas-que-nunca/ https://drive.google.com/file/d/1Lk6tNmYEcCbgIFTD0jBSmBJ4EWCuWswn/view?usp=sharing https://drive.google.com/drive/u/1/fol…	https://youtu.be/Mu0ZJWcLZPU
28	Específico con punto en el mapa	Diputados	Pacífico		Ruta 1: Conflicto Armado	Producto específico de región	Audiovisual	Informe	Proposición desde las víctimas: Apuesta estética, creación del relato para sensibilizar desde la lógica de las víctimas.	Las memorias de Santiago	El 11 de abril de 2002, sucedió el Secuestro de los 12 diputados del Valle del Cauca. Gustavo Arbeláez narra cómo fue responsable de aquel hecho violento cometido en la capital del Valle. Las memorias del antes conocido como alias ‘Santiago’, recopiladas por Marisol Jordán y su equipo de trabajo.	Diputados							Cali	https://drive.google.com/file/d/1SlivFWqG1yogBwYofPLuAJ2z7N_rtG2w/view?usp=sharing	https://public.tableau.com/views/Rutas2021-ConstruccinRutasPedaggicas-Final/ConflictoArmadoPacfico2?:language=es-ES&publish=yes&:display_count=n&:origin=viz_share_link	<div class='tableauPlaceholder' id='viz1646235770081' style='position: relative'><object class='tableauViz' style='display:none;'><param name='host_url' value='https%3A%2F%2Fpublic.tableau.com%2F' /> <param name='embed_code_version' value='3' /> <param name='site_root' value='' /><param name='name' value='Rutas2021-ConstruccinRutasPedaggicas-Final&#47;ConflictoArmadoPacfico2' /><param name='tabs'…	https://www.youtube.com/watch?v=p0I6AN-np6M	https://youtu.be/nde1XzVkmpE
29	Específico con punto en el mapa	Lideres	Pacífico		Ruta 2: Memoria de las Víctimas	Producto específico de región	Audiovisual	Entevista	Consecuencias del proceso de paz, el conflicto y la memoria: ¿Cómo las respuestas de los grupos se han convertido en manifestaciones artísticas, culturales o políticas? Respuesta a un fenómeno social y naturalidad en la población frente a la construcción de memoria. (Ejercicio 100% periodístico para la construcción del producto)	La comunicadora de la paz	Por generaciones su familia y Magaly Ayala sufrieron el Conflicto Armado. En un ejercicio de resiliencia, actualmente Magaly o ‘la comunicadora de la paz’ empodera e informa a las víctimas para salir adelante.	Lider social	Pendiente	EN CADA CIUDAD	No aplica	Pendiente	JOHN, ANGIE, AURORA, SHARIK, MARCELLO	0	Cali, Valle del Cauca	https://drive.google.com/file/d/1OwDVhxgyVS9R7DLJIG6XjK58D4eaMnpW/view?usp=sharing	https://public.tableau.com/views/Rutas2021-ConstruccinRutasPedaggicas-Final/MemoriadelasVctimasPacfico3?:language=es-ES&publish=yes&:display_count=n&:origin=viz_share_link	<div class='tableauPlaceholder' id='viz1646235793187' style='position: relative'><object class='tableauViz' style='display:none;'><param name='host_url' value='https%3A%2F%2Fpublic.tableau.com%2F' /> <param name='embed_code_version' value='3' /> <param name='site_root' value='' /><param name='name' value='Rutas2021-ConstruccinRutasPedaggicas-Final&#47;MemoriadelasVctimasPacfico3' /><param name='t…	http://elclaustro.com.co/elclaustro/retratos-de-una-nueva-oportunidad-exposicion-fotografica-que-cuenta-historias-de-reintegracion/ http://elclaustro.com.co/elclaustro/las-secuelas-de-un-conflicto-inacabado-en-colombia http://elclaustro.com.co/elclaustro/el-instituto-nino-jesus-de-praga-avanza-en-la-creacion-de-ambientes-y-espacios-de-inclusion/	https://youtu.be/vO5rmcRXbZ0
30	Específico con punto en el mapa	Datos del cubrimiento	Pacífico		Ruta 3: Proceso de Paz	Producto específico de región	Gráfico	Infografía	Producción periodística: Vincular el soporte original del medio.	Pacífico Adverso	Las historias de un pacífico adverso, lleno de desigualdad social. Estas son algunas historias sobre la construcción de paz en un amplio territorio aún afectado por la violencia del conflicto.	Productos	Pendiente	Quibdó, Chocó	No aplica	Pendiente	MARCELLO Y DANIELA GIRALDO	500000	Quibdó, Chocó	https://drive.google.com/file/d/1jTwnqPI0VPjzxIDC7DlkAwLZgMXKv37W/view?usp=sharing	https://public.tableau.com/views/Rutas2021-ConstruccinRutasPedaggicas-Final/ProcesodePazPacfico4?:language=es-ES&publish=yes&:display_count=n&:origin=viz_share_link	<div class='tableauPlaceholder' id='viz1646235811114' style='position: relative'><object class='tableauViz' style='display:none;'><param name='host_url' value='https%3A%2F%2Fpublic.tableau.com%2F' /> <param name='embed_code_version' value='3' /> <param name='site_root' value='' /><param name='name' value='Rutas2021-ConstruccinRutasPedaggicas-Final&#47;ProcesodePazPacfico4' /><param name='tabs' va…	https://soundcloud.com/ut-picos-usc/no-queremos-guerra-queremos-la https://www.unisabanamedios.com/escritos-1/cabadías%3A-moda%2C-conflicto-armado-y-superación	No aplica para Youtube
